# Supplementary material for: A Systematic Approach to Pair Secretory Cargo Receptors with Their Cargo Suggests a Mechanism for Cargo Selection by Erv14
Source: PubMed Central journal article supplement (PMC3358343; doi:10.1371/journal.pbio.1001329), 2012-05-22

Herzig *et al.*, Supplementary Figure 2

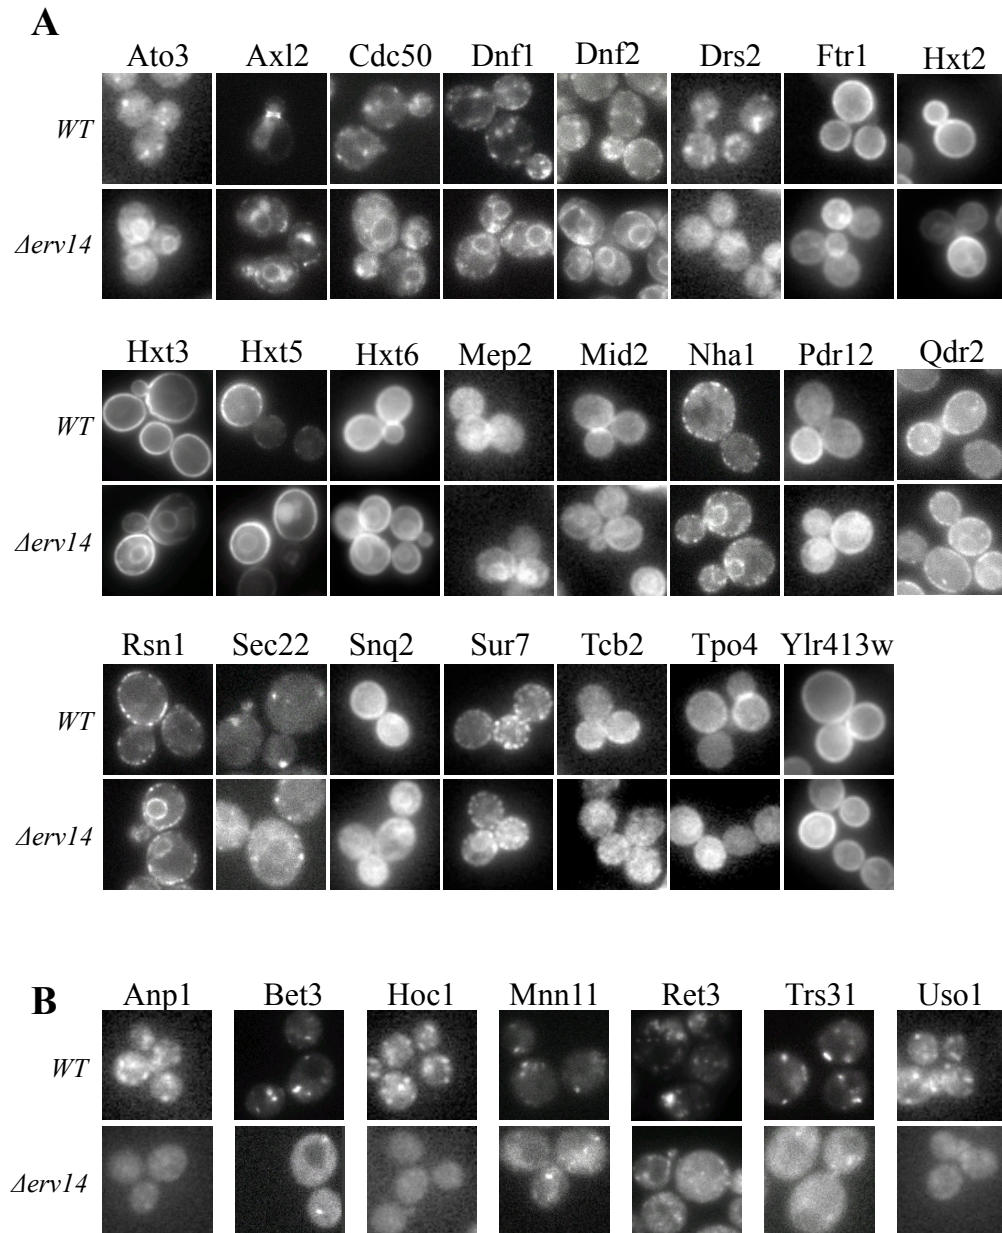

Supplement: pbio.1001329.s002.pdf [file pbio.1001329.s002.pdf]
