# Supplementary material for: A Systematic Approach to Pair Secretory Cargo Receptors with Their Cargo Suggests a Mechanism for Cargo Selection by Erv14
Source: PubMed Central journal article supplement (PMC3358343; doi:10.1371/journal.pbio.1001329), 2012-05-22

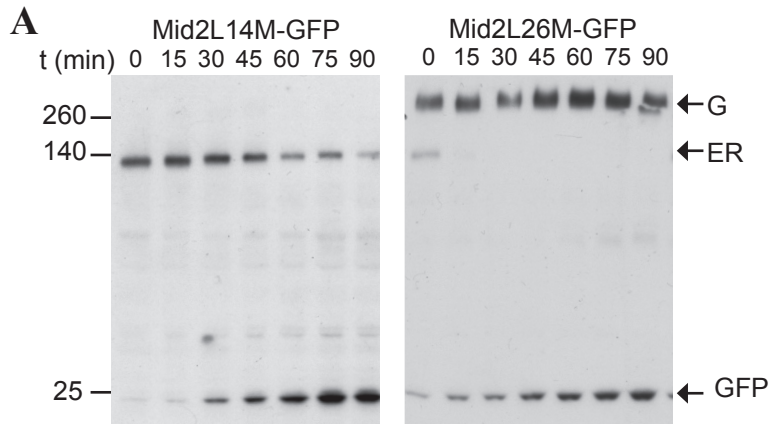

**B**

Mid2 ..SSGLS**KKN**RN**I**VIGCVVGIGVPLILVILALI**Y**MFC**I**QSS**R**TDFIDS..  
 Mid2\* ..SSGLS**KKN**K**R**L**V**IGCVVGIGVPLILVILALI**Y**MFC**I**K**R**S**R**TDFIDS..  
 Mid2L26M ..SSGLS**KKN**K**R**LLLLLLLLLLLLLLLLLLLLLLLLLLLLLLLLLLLLL**L**-**R**S**R**TDFIDS..  
 Mid2WL23W ..SSGLS**KKN**K**R**WLLLLLLLLLLLLLLLLLLLLLLLLLLLLLLLLL**W**-**K**R**S**R**T**DFIDS..

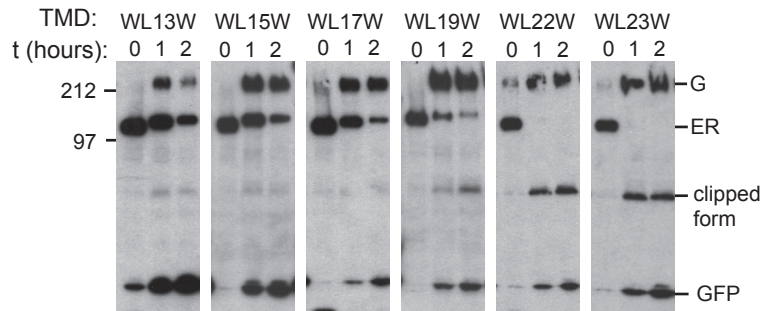

Supplement: pbio.1001329.s006.pdf [file pbio.1001329.s006.pdf]
